**Title:** NICARDIPINE BUT NOT ENALAPRIL PREVENTS RENAL HEMODYNAMIC ALTERATION DURING INFRARENAL AORTIC CROSS-CLAMPING  
**Authors:** P Colson, MD, JPh Gouin, MD, Ch Marty-Ane MD, H Mary, MD, Roquefeuil B, MD.  
**Affiliation:** Dept. of Anesthesiology "B", Hopital St-Eloi, CHU Montpellier, 34059 Montpellier, France.

Infrarenal aortic cross-clamping during abdominal aortic surgery induces renal vasoconstriction, decreases Effective Renal Plasma Flow (ERPF) and Glomerular Filtration Rate (GFR) (1). Treatments with preoperative Enalapril (E), a converting enzyme inhibitor, or peroperative Nicardipine (N), a calcium antagonist, have been tested to assess renin-angiotensin system or calcium channel involvement during infrarenal aortic surgery.

After institutional approval and informed consent, 24 patients (40 to 73-yrs-old) were randomly divided into 3 groups: control (n=8), enalapril (n=8), nicardipine (n=8). E group received E (20mg/bid, PO), 2 days before surgery and placebo during surgery. N group received preoperative placebo and N (2mg bolus, then 2 mg/h) at the time of incision. C group received pre- and peroperative placebos. Anesthesia consisted of flunitrazepam, fentanyl, pancuronium and  $\pm$  droperidol in the 3 groups. Sytemic (Swan Ganz and radial artery catheters) and renal (ERPF and GFR as assessed by Hippuran-1131 and DTPA-Tech99 clearances) hemodynamics were periodically recorded: 1- before aortic clamping (preclamp), 2- during aortic clamping

|      |   | (perclamp),      | 3- after aortic declamping (postclamp). |                  |
|------|---|------------------|-----------------------------------------|------------------|
|      |   | Preclamp         | Perclamp                                | Postclamp        |
| HR   | C | 69.0 $\pm$ 5.1   | 60.4 $\pm$ 3.7                          | 61.1 $\pm$ 4.3   |
|      | E | 80.0 $\pm$ 5.4   | 66.3 $\pm$ 4.0                          | 75.1 $\pm$ 3.5   |
|      | N | * 85.9 $\pm$ 2.4 | 75.5 $\pm$ 6.2                          | * 83.5 $\pm$ 7.0 |
| BP   | C | 85.4 $\pm$ 4.1   | 84.4 $\pm$ 3.4                          | 84.9 $\pm$ 5.0   |
|      | E | 82.3 $\pm$ 1.7   | 84.1 $\pm$ 2.8                          | 87.5 $\pm$ 3.4   |
|      | N | 89.9 $\pm$ 2.4   | 86.4 $\pm$ 3.7                          | 83.9 $\pm$ 3.1   |
| PCWP | C | 11.6 $\pm$ 1.6   | 10.1 $\pm$ 1.3                          | 9.4 $\pm$ 1.5    |
|      | E | 14.0 $\pm$ 1.0   | 12.0 $\pm$ 1.1                          | 13.0 $\pm$ 1.5   |
|      | N | 13.3 $\pm$ 1.4   | 13.2 $\pm$ 1.6                          | 12.2 $\pm$ 2.0   |
| CO   | C | 7.6 $\pm$ 0.7    | 5.1 $\pm$ 0.4                           | 5.6 $\pm$ 0.4    |
|      | E | 6.5 $\pm$ 0.9    | 5.2 $\pm$ 0.4                           | 6.0 $\pm$ 0.4    |
|      | N | 8.2 $\pm$ 0.6    | 4.5 $\pm$ 0.3                           | 6.8 $\pm$ 0.5    |
| ERPF | C | 227.3 $\pm$ 62.4 | 185.4 $\pm$ 44.7                        | 317.5 $\pm$ 61.0 |
|      | E | 433.0 $\pm$ 193  | 268.5 $\pm$ 61.8                        | 352.5 $\pm$ 51.8 |
|      | N | 336.2 $\pm$ 90.4 | 352.4 $\pm$ 65.2                        | 260.4 $\pm$ 43.4 |
| GFR  | C | 71.4 $\pm$ 20.3  | 40.8 $\pm$ 8.5                          | 59.6 $\pm$ 9.0   |
|      | E | 74.4 $\pm$ 15.3  | 49.1 $\pm$ 10.7                         | 64.0 $\pm$ 7.4   |
|      | N | 63.2 $\pm$ 11.0  | * 78.9 $\pm$ 14.3                       | 71.6 $\pm$ 10    |

m $\pm$ sem, \* p<0.05 between groups  
 Thus, renin-angiotensin seems to be not involved in renal function alteration during infrarenal aortic cross clamping. The beneficial effect of low doses of N might be accounted for by the abolition of renal autoregulation (2), which appears to be impaired during aortic cross-clamping.  
 References: 1) Anesthesiology 61:394,1984.  
 2) Circ Res 59:483, 1986.

**TITLE:** BOLUS DOSES OF ESMOLOL FOR THE PREVENTION OF PERIO-OPERATIVE HYPERTENSION AND TACHYCARDIA IN CARDIOVASCULAR SURGERY PATIENTS.  
**AUTHORS:** P.C. Duke, MD, P. Goertzen, MD, B. Muirhead, MD, R. Greengrass, MD, D. Paetkau, MD.  
**AFFILIATION:** Department of Anesthesia, University of Manitoba, Health Sciences Centre, CANADA.

**Introduction** Endotracheal intubation frequently results in marked elevation in heart rate (HR) and/or blood pressure. The objective is to demonstrate the effectiveness of bolus doses of esmolol (E), a short acting  $\beta$ -selective blocking agent, to prevent intubation induced elevations in HR and mean arterial pressure (MAP) in patients undergoing peripheral vascular (PV) procedures who are at risk to develop myocardial ischemia.

**Methods** With Ethics Committee approval, 27 PV (ASA II, III) patients were studied in a double blind manner and were randomly divided into 3 groups: placebo (P), esmolol 100 mg (E-100) or esmolol 200 mg (E-200) by bolus, 90 seconds prior to induction with thiopental. HR and direct MAP were observed at baseline and post-induction (PI) at 0.5, 1.5, 2.5, 3.5, 4.5 and 5.5 minutes. ECG leads II and V<sub>5</sub> (Monitor) and Holter leads II and CB<sub>5</sub> were used to monitor for myocardial ischemia.

Analysis of covariance was utilized to determine significance difference between the 3 groups.

**Results** Mean HR's PI were lower (p<.01) in each of the E groups compared to P. The PI HR was 44% above baseline in the P group, 9% below baseline in the E-100 group (p<.01 vs P), and 3% below baseline in the E-200 group (p<.01 vs P). Mean HR's were consistently lower in the E groups than in the P group for up to 4.5 minutes PI. No significant differences were detected between the esmolol groups. Ischemia was detected in 6 patients: P=3, E-100=1 and E-200=2.

**Conclusion** In PV patients, bolus doses of 100 or 200 mg of E, 90 seconds prior to intubation, effectively blunts maximum HR responses to intubation. Mean PI MAP(s) were significantly lower after E compared to P. No difference was detected in the incidence of hypotension, bradycardia, arrhythmias, or ischemia.

| HEART RATE              | E100 | E200  |
|-------------------------|------|-------|
| Baseline                | 77   | 77    |
| Post-induction          | 83   | 75    |
| Post-intubation maximum | 131  | 86 ** |
| 0.5 min post-intubation | 108  | 81 ** |
| 1.5 min post-intubation | 101  | 78 ** |
| 2.5 min post-intubation | 96   | 77 ** |
| 3.5 min post-intubation | 93   | 79 *  |
| 4.5 min post-intubation | 88   | 78    |
| 5.5 min post-intubation | 81   | 72    |

  

| MEAN ARTERIAL PRESSURE  | E100 | E200   |
|-------------------------|------|--------|
| Baseline                | 100  | 99     |
| Post-induction          | 108  | 86 **  |
| Post-intubation maximum | 132  | 120 ** |
| 0.5 min post-intubation | 144  | 107 ** |
| 1.5 min post-intubation | 149  | 109 ** |
| 2.5 min post-intubation | 135  | 109 *  |
| 3.5 min post-intubation | 117  | 110    |
| 4.5 min post-intubation | 106  | 96     |
| 5.5 min post-intubation | 96   | 91     |

\* P  $\leq$  .05 (compared to placebo)  
 \*\* P  $\leq$  .01 (compared to placebo)
